# Supplementary material for: Comparative analysis of the insecticidal activity against Sitophilus oryzae (L.) and agro-morphological characteristics of maize using non-biogenic and biogenic ZnO nanoparticles
Source: Royal Society of Chemistry journal article supplement (doi:10.1039/d3en00839h), 2024-01-01

### Supplementary Information

Comparative analysis of insecticidal value against *Sitophilus oryzae* (L.) and agro-morphological characteristics of maize using non-biogenic and biogenic ZnO nanoparticles.

S. Aisvarya<sup>1</sup>, M. Kalyanasundaram<sup>1</sup>, M. Kannan<sup>1\*</sup>, P. Arunkumar<sup>1</sup>, S. Preetha<sup>1</sup>, K. Elango<sup>2</sup>, K. Govindaraju<sup>3</sup>

<sup>1</sup>Department of Agricultural Entomology, Tamil Nadu Agricultural University, Coimbatore 641003, India

<sup>2</sup>Kumaraguru Institute of Agriculture, Erode, Tamil Nadu, India

<sup>3</sup>Centre for Ocean Research, Sathyabama Institute of Science and Technology, Chennai 600 119, India

\*Corresponding author: kanento@gmail.com (Dr. M. Kannan)

Supplementary Figure 1 shows non-biogenic (sol-gel) and biogenic zinc nanoparticles (a) UV-vis spectroscopy; (b) FT-IR; (c) Zeta potential measurements and (d) XRD pattern

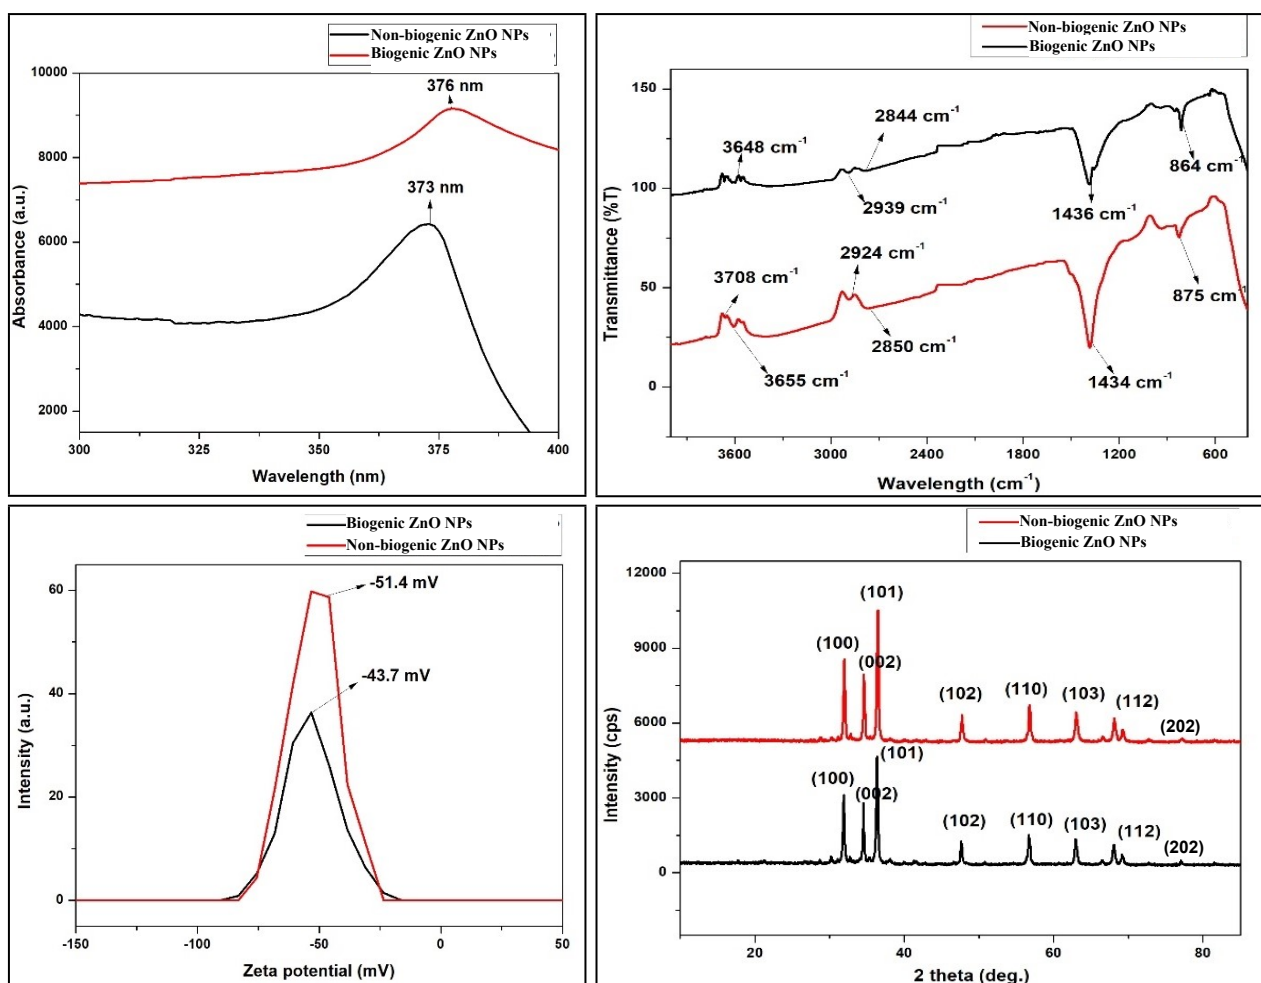

**Supplementary Figure 2 Germination and seedlings treated with LD<sub>90</sub> dose of (a) non-biogenic (sol-gel) zinc nanoparticles; (b) biogenic zinc nanoparticles; (c) Zinc acetate; (d) malathion 5D and (e) Control primed maize seed.**

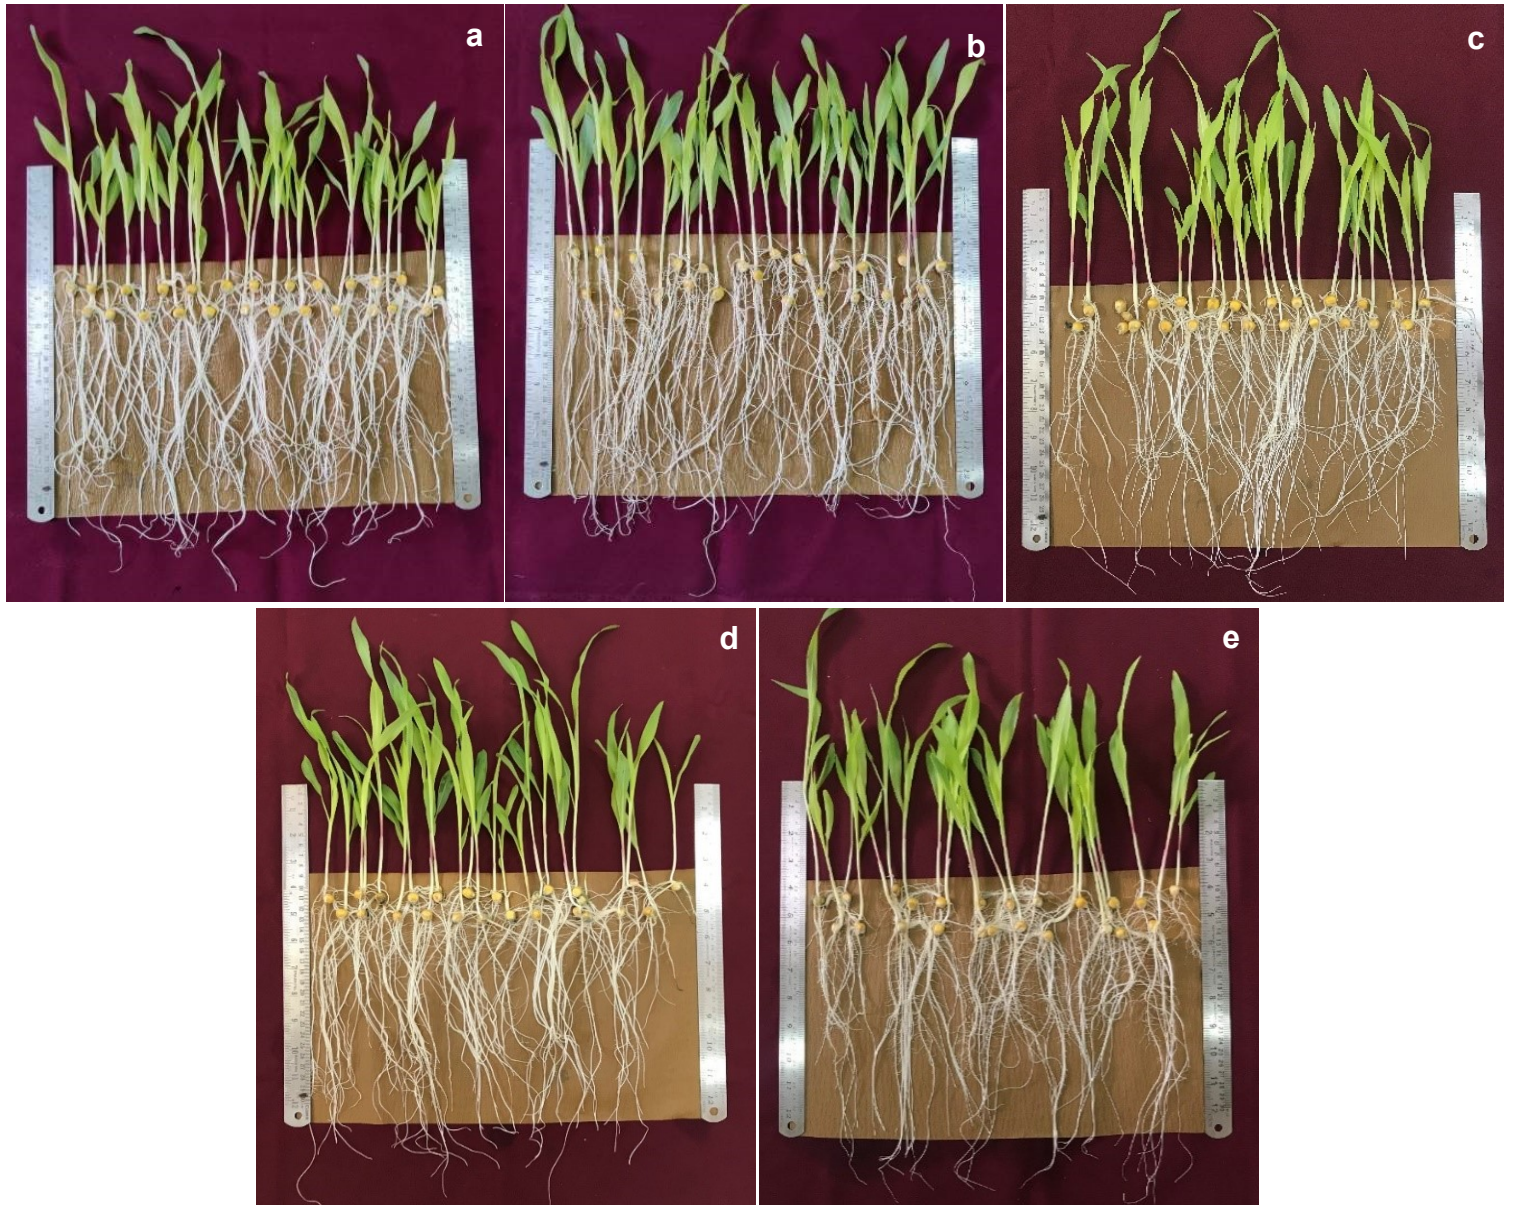

Supplement: d3en00839h1.pdf [file d3en00839h1.pdf]
